# Supplementary material for: A family of 3D lanthanide–organic frameworks constructed from parallelogram secondary building units: synthesis, structures and properties
Source: Royal Society of Chemistry journal article supplement (doi:10.1039/c3ce42197j), 2013-12-11
Supplement: c3ce42197j.pdf [file c3ce42197j.pdf]

**A Family of 3D Lanthanide-Organic Frameworks Constructed from  
Parallelogram Secondary Building Units: Synthesis, Structures and  
Properties.**

Ya-guang Sun, Jian Li, Ke-long Li, Zhen-he Xu, Fu Ding, En-jun Gao, Shu-ju Wang, Li-xin You,  
Gang Xiong, Philippe F. Smet

**Table S1 Selected bond distances (Å) and bond angles (°)**

| <b>Compound 1</b> |           |                      |           |
|-------------------|-----------|----------------------|-----------|
| Bond              | Dist(Å)   | Bond                 | Dist(Å)   |
| La(1)-O(9)#1      | 2.413 (2) | La(2)-O(18)          | 2.514(7)  |
| La(1)-O(2)        | 2.503     | La(2)-O(16)          | 2.523(7)  |
| La(1)-O(12)       | 2.506 (2) | La(2)-O(14)          | 2.549 (3) |
| La(1)-O(7)        | 2.576 (5) | La(2)-O(3)           | 2.551 (3) |
| La(1)-O(11)       | 2.595 (3) | La(2)-O(1)           | 2.588 (3) |
| La(1)-O(4)        | 2.614 (8) | La(2)-O(17) #4       | 2.593(4)  |
| La(1)-O(6)        | 2.629(2)  | La(2)-O(19)          | 2.595 (4) |
| La(1)-O(8)        | 2.634(5)  | La(2)-O(15)          | 2.625 (9) |
| La(1)-O(13)       | 2.636     | La(2)-O(5)           | 2.625 (9) |
| Angle             | (°)       | Angle                | (°)       |
| O(9)-La(1)-O(2)   | 81.2(5)   | O(18)-La(2)-O(16)    | 139.4(5)  |
| O(9)-La(1)-O(12)  | 85.0(5)   | O(18)-La(2)-O(14)    | 68.4(4)   |
| O(2)-La(1)-O(12)  | 149.7(5)  | O(16)-La(2)-O(14)    | 143.9(4)  |
| O(9)-La(1)-O(7)   | 125.1(6)  | O(18)-La(2)-O(3)     | 64.0(5)   |
| O(2)-La(1)-O(7)   | 102.7(6)  | O(16)-La(2)-O(3)     | 75.9(5)   |
| O(12)-La(1)-O(7)  | 64.3(5)   | O(14)-La(2)-O(3)     | 128.6(4)  |
| O(9)-La(1)-O(11)  | 72.6(6)   | O(18)-La(2)-O(1)     | 97.0(5)   |
| O(2)-La(1)-O(11)  | 128.0(6)  | O(16)-La(2)-O(1)     | 73.2(5)   |
| O(12)-La(1)-O(11) | 71.9(5)   | O(14)-La(2)-O(1)     | 136.0(4)  |
| O(7)-La(1)-O(11)  | 129.2(5)  | O(3)-La(2)-O(1)      | 69.4(5)   |
| O(9)-La(1)-O(4)   | 68.5(6)   | O(18)-La(2)-O(17) #2 | 73.2(5)   |
| O(2)-La(1)-O(4)   | 63.0(5)   | O(16)-La(2)-O(17) #2 | 128.8(5)  |
| O(12)-La(1)-O(4)  | 86.9(5)   | O(14)-La(2)-O(17) #2 | 73.3(4)   |
| O(7)-La(1)-O(4)   | 65.7(5)   | O(3)-La(2)-O(17) #2  | 108.9(5)  |
| O(11)-La(1)-O(4)  | 136.9(6)  | O(1) -La(2)-O(17) #2 | 62.6(4)   |
| O(9)-La(1)-O(6)   | 155.4(5)  | O(18)-La(2)-O(19)    | 145.6(6)  |
| O(2)-La(1)-O(6)   | 75.4(4)   | O(16)-La(2)-O(19)    | 72.9(7)   |
| O(12)-La(1)-O(6)  | 119.3(4)  | O(14)-La(2)-O(19)    | 90.0(6)   |
| O(7)-La(1)-O(6)   | 68.7(5)   | O(3)-La(2)-O(19)     | 141.2(6)  |
| O(11)-La(1)-O(6)  | 116.4(5)  | O(1) -La(2)-O(19)    | 79.9(6)   |
| O(4)-La(1)-O(6)   | 106.7(5)  | O(17) #2-La(2)-O(19) | 75.1(6)   |
| O(9)-La(1)-O(8)   | 150.4(5)  | O(18)-La(2)-O(5)     | 73.4(5)   |
| O(2)-La(1)-O(8)   | 124.4(4)  | O(16)-La(2)-O(5)     | 88.5(5)   |
| O(12)-La(1)-O(8)  | 78.0(4)   | O(14)-La(2)-O(5)     | 78.3(5)   |
| O(7)-La(1)-O(8)   | 68.2(5)   | O(3)-La(2)-O(5)      | 70.8(5)   |
| O(11)-La(1)-O(8)  | 79.0(5)   | O(1) -La(2)-O(5)     | 139.2(5)  |
| O(4)-La(1)-O(8)   | 133.6(5)  | O(17) #2-La(2)-O(5)  | 142.2(5)  |
| O(6)-La(1)-O(8)   | 49.6(4)   | O(19)-La(2)-O(5)     | 129.8(5)  |
| O(9)-La(1)-O(13)  | 98.7(6)   | O(18)-La(2)-O(15)    | 127.5(5)  |
| O(2)-La(1)-O(13)  | 72.9(5)   | O(16)-La(2)-O(15)    | 69.1(5)   |

|                   |          |                     |          |
|-------------------|----------|---------------------|----------|
| O(12)-La(1)-O(13) | 136.2(5) | O(14)-La(2)-O(15)   | 75.0(4)  |
| O(7)-La(1)-O(13)  | 135.2(5) | O(3)-La(2)-O(15)    | 121.6(5) |
| O(11)-La(1)-O(13) | 67.9(6)  | O(1)-La(2)-O(15)    | 135.1(5) |
| O(4)-La(1)-O(13)  | 135.2(5) | O(17)#2-La(2)-O(15) | 129.5(5) |
| O(6)-La(1)-O(13)  | 67.1(5)  | O(19)-La(2)-O(15)   | 66.6(5)  |
| O(8)-La(1)-O(13)  | 78.0(5)  | O(5)-La(2)-O(15)    | 63.2(4)  |

Symmetry codes: #1 x-1,y,z-1; #2 x+1,-y+1/2,z+1/2; #3 x+1,y,z+1; #4 x-1,-y+1/2,z-1/2;  
#5 -x+1,-y,-z+2

### Compound 2

| Bond                | Dist(Å)    | Bond               | Dist(Å)    |
|---------------------|------------|--------------------|------------|
| Pr(1)-O(18)         | 2.444(4)   | Pr(2)-O(4) #2      | 2.371(4)   |
| Pr(1)-O(8)          | 2.456(4)   | Pr(2)-O(14) #1     | 2.449(4)   |
| Pr(1)-O(19)         | 2.492(4)   | Pr(2)-O(5)         | 2.466(4)   |
| Pr(1)-O(7)          | 2.515(4)   | Pr(2)-O(15)        | 2.524(4)   |
| Pr(1)-O(9)          | 2.534(4)   | Pr(2)-O(13)        | 2.530(4)   |
| Pr(1)-O(10)         | 2.558(4)   | Pr(2)-O(16)        | 2.563(5)   |
| Pr(1)-O(12)#1       | 2.561(4)   | Pr(2)-O(2)         | 2.555(4)   |
| Pr(1)-O(17)         | 2.578(4)   | Pr(2)-O(6)         | 2.567(4)   |
| Pr(1)-O(11)#1       | 2.573(4)   | Pr(2)-O(1)         | 2.582(4)   |
| Angle               | (°)        | Angle              | (°)        |
| O(18)-Pr(1)-O(8)    | 139.06(14) | O(4)#2-Pr(2)-O(14) | 85.48(14)  |
| O(18)-Pr(1)-O(19)   | 143.93(13) | O(4)#2-Pr(2)-O(5)  | 81.20(14)  |
| O(8)-Pr(1)-O(19)    | 69.34(14)  | O(14)-Pr(2)-O(5)   | 150.83(14) |
| O(18)-Pr(1)-O(7)    | 74.73(13)  | O(4)#2-Pr(2)-O(15) | 71.81(16)  |
| O(8)-Pr(1)-O(7)     | 64.65(12)  | O(14)-Pr(2)-O(15)  | 71.38(14)  |
| O(19)-Pr(1)-O(7)    | 129.97(13) | O(5)-Pr(2)-O(15)   | 127.33(15) |
| O(18)-Pr(1)-O(9)    | 72.97(12)  | O(4)#2-Pr(2)-O(13) | 128.18(15) |
| O(8)-Pr(1)-O(9)     | 96.58(13)  | O(14)-Pr(2)-O(13)  | 65.56(13)  |
| O(19)-Pr(1)-O(9)    | 135.51(13) | O(5)-Pr(2)-O(13)   | 103.36(14) |
| O(7)-Pr(1)-O(9)     | 69.73(13)  | O(15)-Pr(2)-O(13)  | 128.97(14) |
| O(18)-Pr(1)-O(10)   | 129.48(13) | O(4)#2-Pr(2)-O(2)  | 148.78(14) |
| O(8)-Pr(1)-O(10)    | 72.55(14)  | O(14)-Pr(2)-O(2)   | 78.70(13)  |
| O(19)-Pr(1)-O(10)   | 72.14(13)  | O(5)-Pr(2)-O(2)    | 123.97(13) |
| O(7)-Pr(1)-O(10)    | 110.13(14) | O(15)-Pr(2)-O(2)   | 77.65(14)  |
| O(9)-Pr(1)-O(10)    | 63.37(12)  | O(13)-Pr(2)-O(2)   | 68.41(13)  |
| O(18)-Pr(1)-O(12)#1 | 69.22(12)  | O(4)#2-Pr(2)-O(16) | 95.44(16)  |
| O(8)-Pr(1)-O(12)#1  | 128.19(12) | O(14)-Pr(2)-O(16)  | 135.53(15) |
| O(19)-Pr(1)-O(12)#1 | 74.96(13)  | O(5)-Pr(2)-O(16)   | 71.88(14)  |
| O(7)-Pr(1)-O(12)#1  | 120.71(13) | O(15)-Pr(2)-O(16)  | 66.89(15)  |
| O(9)-Pr(1)-O(12)#1  | 134.89(12) | O(13)-Pr(2)-O(16)  | 135.55(15) |
| O(10)-Pr(1)-O(12)#1 | 129.15(13) | O(2)-Pr(2)-O(16)   | 78.11(15)  |
| O(18)-Pr(1)-O(11)#1 | 88.99(14)  | O(4)#2-Pr(2)-O(6)  | 70.15(16)  |
| O(8)-Pr(1)-O(11)#1  | 73.59(13)  | O(14)-Pr(2)-O(6)   | 86.36(14)  |

|                       |            |                   |            |
|-----------------------|------------|-------------------|------------|
| O(19)-Pr(1)-O(11)#1   | 78.54(14)  | O(5)-Pr(2)-O(6)   | 64.73(13)  |
| O(7)-Pr(1)-O(11)#1    | 70.78(13)  | O(15)-Pr(2)-O(6)  | 137.03(16) |
| O(9)-Pr(1)-O(11)#1    | 139.63(13) | O(13)-Pr(2)-O(6)  | 66.19(14)  |
| O(10)-Pr(1)-O(11)#1   | 141.15(13) | O(2)-Pr(2)-O(6)   | 134.42(14) |
| O(12)#1-Pr(1)-O(11)#1 | 63.31(12)  | O(16)-Pr(2)-O(6)  | 135.70(15) |
| O(18)-Pr(1)-O(17)     | 73.75(16)  | O(4)#2-Pr(2)-O(1) | 153.46(14) |
| O(8)-Pr(1)-O(17)      | 145.04(15) | O(14)-Pr(2)-O(1)  | 120.94(12) |
| O(19)-Pr(1)-O(17)     | 88.19(16)  | O(5)-Pr(2)-O(1)   | 73.98(13)  |
| O(7)-Pr(1)-O(17)      | 141.72(15) | O(15)-Pr(2)-O(1)  | 116.58(14) |
| O(9)-Pr(1)-O(17)      | 80.67(14)  | O(13)-Pr(2)-O(1)  | 68.14(13)  |
| O(10)-Pr(1)-O(17)     | 75.24(15)  | O(2)-Pr(2)-O(1)   | 50.99(12)  |
| O(12)#1-Pr(1)-O(17)   | 65.97(13)  | O(16)-Pr(2)-O(1)  | 68.18(14)  |
| O(11)#1-Pr(1)-O(17)   | 129.28(13) | O(6)-Pr(2)-O(1)   | 106.38(14) |

Symmetry codes: #1  $x+1, -y+1/2, z+1/2$ ; #2  $x-1, y, z-1$ ; #3  $x+1, y, z+1$ ; #4  $x-1, -y+1/2, z-1/2$ ;

#5  $-x+1, -y, -z+1$

### Compound 3

| Bond               | Dist(Å)   | Bond              | Dist(Å)   |
|--------------------|-----------|-------------------|-----------|
| Sm(1)-O(1)         | 2.325(9)  | Sm(2)-O(8)        | 2.434(9)  |
| Sm(1)-O(9)         | 2.417(9)  | Sm(2)-O(19)       | 2.457(10) |
| Sm(1)-O(6)         | 2.433(9)  | Sm(2)-O(16)       | 2.466(10) |
| Sm(1)-O(12)        | 2.484(10) | Sm(2)-O(7)        | 2.485(8)  |
| Sm(1)-O(13)        | 2.494(10) | Sm(2)-O(18)       | 2.486(8)  |
| Sm(1)-O(4)#1       | 2.508(9)  | Sm(2)-O(10)       | 2.513(9)  |
| Sm(1)-O(14)        | 2.539(10) | Sm(2)-O(17)       | 2.519(10) |
| Sm(1)-O(3)#1       | 2.545(9)  | Sm(2)-O(11)       | 2.522(9)  |
| Sm(1)-O(5)         | 2.556(10) | Sm(2)-O(15)       | 2.534(9)  |
| Angle              | (°)       | Angle             | (°)       |
| O(1)-Sm(1)-O(9)    | 85.0(3)   | O(8)-Sm(2)-O(19)  | 139.9(3)  |
| O(1)-Sm(1)-O(6)    | 80.8(3)   | O(8)-Sm(2)-O(16)  | 69.0(3)   |
| O(9)-Sm(1)-O(6)    | 152.1(4)  | O(19)-Sm(2)-O(16) | 143.4(3)  |
| O(1)-Sm(1)-O(12)   | 73.2(4)   | O(8)-Sm(2)-O(7)   | 66.0(3)   |
| O(9)-Sm(1)-O(12)   | 70.7(4)   | O(19)-Sm(2)-O(7)  | 74.2(3)   |
| O(6)-Sm(1)-O(12)   | 126.6(4)  | O(16)-Sm(2)-O(7)  | 130.7(3)  |
| O(1)-Sm(1)-O(13)   | 128.1(4)  | O(8)-Sm(2)-O(18)  | 98.4(3)   |
| O(9)-Sm(1)-O(13)   | 66.3(3)   | O(19)-Sm(2)-O(18) | 71.0(3)   |
| O(6)-Sm(1)-O(13)   | 104.6(3)  | O(16)-Sm(2)-O(18) | 137.6(3)  |
| O(12)-Sm(1)-O(13)  | 128.2(4)  | O(7)-Sm(2)-O(18)  | 69.3(3)   |
| O(1)-Sm(1)-O(4)#1  | 148.0(4)  | O(8)-Sm(2)-O(10)  | 72.5(3)   |
| O(9)-Sm(1)-O(4)#1  | 79.6(3)   | O(19)-Sm(2)-O(10) | 129.8(3)  |
| O(6)-Sm(1)-O(4)#1  | 123.5(3)  | O(16)-Sm(2)-O(10) | 71.6(3)   |
| O(12)-Sm(1)-O(4)#1 | 75.2(4)   | O(7)-Sm(2)-O(10)  | 111.6(3)  |
| O(13)-Sm(1)-O(4)#1 | 70.0(3)   | O(18)-Sm(2)-O(10) | 66.0(3)   |
| O(1)-Sm(1)-O(14)   | 94.5(4)   | O(8)-Sm(2)-O(17)  | 145.5(3)  |

|                     |          |                   |          |
|---------------------|----------|-------------------|----------|
| O(9)-Sm(1)-O(14)    | 135.3(4) | O(19)-Sm(2)-O(17) | 72.2(4)  |
| O(6)-Sm(1)-O(14)    | 70.1(4)  | O(16)-Sm(2)-O(17) | 89.9(4)  |
| O(12)-Sm(1)-O(14)   | 66.5(4)  | O(7)-Sm(2)-O(17)  | 139.3(4) |
| O(13)-Sm(1)-O(14)   | 136.5(4) | O(18)-Sm(2)-O(17) | 78.6(3)  |
| O(4)#1-Sm(1)-O(14)  | 77.6(4)  | O(10)-Sm(2)-O(17) | 75.1(4)  |
| O(1)-Sm(1)-O(3)#1   | 152.0(3) | O(8)-Sm(2)-O(11)  | 128.8(3) |
| O(9)-Sm(1)-O(3)#1   | 123.0(3) | O(19)-Sm(2)-O(11) | 68.7(3)  |
| O(6)-Sm(1)-O(3)#1   | 73.2(3)  | O(16)-Sm(2)-O(11) | 74.9(3)  |
| O(12)-Sm(1)-O(3)#1  | 114.5(4) | O(7)-Sm(2)-O(11)  | 120.7(3) |
| O(13)-Sm(1)-O(3)#1  | 70.0(3)  | O(18)-Sm(2)-O(11) | 132.4(3) |
| O(4)#1-Sm(1)-O(3)#1 | 51.6(3)  | O(10)-Sm(2)-O(11) | 127.7(3) |
| O(14)-Sm(1)-O(3)#1  | 67.1(3)  | O(17)-Sm(2)-O(11) | 65.8(3)  |
| O(1)-Sm(1)-O(5)     | 69.3(4)  | O(8)-Sm(2)-O(15)  | 72.5(3)  |
| O(9)-Sm(1)-O(5)     | 86.4(4)  | O(19)-Sm(2)-O(15) | 90.3(4)  |
| O(6)-Sm(1)-O(5)     | 66.1(3)  | O(16)-Sm(2)-O(15) | 77.5(3)  |
| O(12)-Sm(1)-O(5)    | 137.4(4) | O(7)-Sm(2)-O(15)  | 70.8(3)  |
| O(13)-Sm(1)-O(5)    | 66.7(3)  | O(18)-Sm(2)-O(15) | 139.2(3) |
| O(4)#1-Sm(1)-O(5)   | 136.6(3) | O(10)-Sm(2)-O(15) | 139.6(4) |
| O(14)-Sm(1)-O(5)    | 135.1(3) | O(17)-Sm(2)-O(15) | 130.8(3) |
| O(3)#1-Sm(1)-O(5)   | 108.1(3) | O(11)-Sm(2)-O(15) | 65.1(3)  |

Symmetry codes: #1 x+1,y,z+1; #2 x-1,y,z-1; #3 -x+1,-y,-z+1; #4 x,-y+1/2,z+1/2;

#5 x,-y+1/2,z-1/2

#### Compound 4

| Bond              | Dist(Å)    | Bond               | Dist(Å)    |
|-------------------|------------|--------------------|------------|
| Eu(1)-O(19)       | 2.394(4)   | Eu(2)-O(1)#1       | 2.310(4)   |
| Eu(1)-O(7)        | 2.405(4)   | Eu(2)-O(10)        | 2.402(4)   |
| Eu(1)-O(17)       | 2.415(4)   | Eu(2)-O(5)         | 2.414(4)   |
| Eu(1)-O(8)        | 2.471(4)   | Eu(2)-O(3)         | 2.475(4)   |
| Eu(1)-O(11)       | 2.478(4)   | Eu(2)-O(15)        | 2.484(4)   |
| Eu(1)-O(18)       | 2.488(4)   | Eu(2)-O(16)        | 2.484(4)   |
| Eu(1)-O(14)       | 2.526(4)   | Eu(2)-O(9)         | 2.492(4)   |
| Eu(1)-O(13)       | 2.528(4)   | Eu(2)-O(4)         | 2.521(4)   |
| Eu(1)-O(12)       | 2.531(4)   | Eu(2)-O(6)         | 2.522(4)   |
| Angle             | (°)        | Angle              | (°)        |
| O(19)-Eu(1)-O(7)  | 139.69(13) | O(1)#1-Eu(2)-O(10) | 85.15(14)  |
| O(19)-Eu(1)-O(17) | 143.26(13) | O(1)#1-Eu(2)-O(5)  | 81.46(15)  |
| O(7)-Eu(1)-O(17)  | 69.67(13)  | O(10)-Eu(2)-O(5)   | 151.97(14) |
| O(19)-Eu(1)-O(8)  | 73.81(13)  | O(1)#1-Eu(2)-O(3)  | 147.02(14) |
| O(7)-Eu(1)-O(8)   | 66.18(13)  | O(10)-Eu(2)-O(3)   | 79.69(13)  |
| O(17)-Eu(1)-O(8)  | 131.57(13) | O(5)-Eu(2)-O(3)    | 123.34(13) |
| O(19)-Eu(1)-O(11) | 72.84(13)  | O(1)#1-Eu(2)-O(15) | 71.48(16)  |
| O(7)-Eu(1)-O(11)  | 96.89(14)  | O(10)-Eu(2)-O(15)  | 70.41(14)  |
| O(17)-Eu(1)-O(11) | 135.64(13) | O(5)-Eu(2)-O(15)   | 126.96(15) |

|                   |            |                    |            |
|-------------------|------------|--------------------|------------|
| O(8)-Eu(1)-O(11)  | 69.63(13)  | O(3)-Eu(2)-O(15)   | 75.86(14)  |
| O(19)-Eu(1)-O(18) | 73.84(15)  | O(1)#1-Eu(2)-O(16) | 92.43(16)  |
| O(7)-Eu(1)-O(18)  | 143.95(14) | O(10)-Eu(2)-O(16)  | 135.30(15) |
| O(17)-Eu(1)-O(18) | 88.05(15)  | O(5)-Eu(2)-O(16)   | 70.07(15)  |
| O(8)-Eu(1)-O(18)  | 140.25(15) | O(3)-Eu(2)-O(16)   | 78.62(15)  |
| O(11)-Eu(1)-O(18) | 79.21(14)  | O(15)-Eu(2)-O(16)  | 66.60(14)  |
| O(19)-Eu(1)-O(14) | 68.62(13)  | O(1)#1-Eu(2)-O(9)  | 130.06(15) |
| O(7)-Eu(1)-O(14)  | 128.99(13) | O(10)-Eu(2)-O(9)   | 66.59(13)  |
| O(17)-Eu(1)-O(14) | 74.91(13)  | O(5)-Eu(2)-O(9)    | 104.37(15) |
| O(8)-Eu(1)-O(14)  | 120.34(13) | O(3)-Eu(2)-O(9)    | 69.16(14)  |
| O(11)-Eu(1)-O(14) | 133.86(13) | O(15)-Eu(2)-O(9)   | 128.08(14) |
| O(18)-Eu(1)-O(14) | 66.60(13)  | O(16)-Eu(2)-O(9)   | 136.72(15) |
| O(19)-Eu(1)-O(13) | 89.55(15)  | O(1)#1-Eu(2)-O(4)  | 151.85(13) |
| O(7)-Eu(1)-O(13)  | 73.47(14)  | O(10)-Eu(2)-O(4)   | 122.98(13) |
| O(17)-Eu(1)-O(13) | 78.35(14)  | O(5)-Eu(2)-O(4)    | 72.57(13)  |
| O(8)-Eu(1)-O(13)  | 71.05(14)  | O(3)-Eu(2)-O(4)    | 52.17(12)  |
| O(11)-Eu(1)-O(13) | 140.00(13) | O(15)-Eu(2)-O(4)   | 116.15(14) |
| O(18)-Eu(1)-O(13) | 130.80(13) | O(16)-Eu(2)-O(4)   | 68.87(15)  |
| O(14)-Eu(1)-O(13) | 64.22(12)  | O(9)-Eu(2)-O(4)    | 68.66(13)  |
| O(19)-Eu(1)-O(12) | 130.29(14) | O(1)#1-Eu(2)-O(6)  | 71.15(16)  |
| O(7)-Eu(1)-O(12)  | 71.87(14)  | O(10)-Eu(2)-O(6)   | 86.30(14)  |
| O(17)-Eu(1)-O(12) | 71.21(13)  | O(5)-Eu(2)-O(6)    | 66.10(13)  |
| O(8)-Eu(1)-O(12)  | 111.37(14) | O(3)-Eu(2)-O(6)    | 135.93(14) |
| O(11)-Eu(1)-O(12) | 64.45(12)  | O(15)-Eu(2)-O(6)   | 137.17(15) |
| O(18)-Eu(1)-O(12) | 74.29(15)  | O(16)-Eu(2)-O(6)   | 134.85(14) |
| O(14)-Eu(1)-O(12) | 128.29(12) | O(9)-Eu(2)-O(6)    | 66.91(14)  |
| O(13)-Eu(1)-O(12) | 139.90(14) | O(4)-Eu(2)-O(6)    | 106.67(14) |

Symmetry codes: #1 x-1,y,z-1; #2 -x+1,-y,-z+1; #3 x+1,y,z+1; #4 x+1,-y+1/2,z+1/2;

#5 x-1,-y+1/2,z-1/2

### Compound 5

| Bond               | Dist(Å)   | Bond             | Dist(Å)  |
|--------------------|-----------|------------------|----------|
| Gd(1)-O(3)#1       | 2.309(8)  | Gd(2)-O(8)       | 2.384(8) |
| Gd(1)-O(5)         | 2.399(8)  | Gd(2)-O(19)      | 2.401(8) |
| Gd(1)-O(14)        | 2.402(8)  | Gd(2)-O(17)      | 2.405(9) |
| Gd(1)-O(1)         | 2.471(9)  | Gd(2)-O(7)       | 2.459(8) |
| Gd(1)-O(16)        | 2.475(10) | Gd(2)-O(11)      | 2.477(8) |
| Gd(1)-O(13)        | 2.484(9)  | Gd(2)-O(18)      | 2.481(9) |
| Gd(1)-O(15)        | 2.490(10) | Gd(2)-O(12)      | 2.519(9) |
| Gd(1)-O(6)         | 2.504(10) | Gd(2)-O(9)       | 2.528(9) |
| Gd(1)-O(2)         | 2.522(8)  | Gd(2)-O(10)      | 2.541(9) |
| Angle              | (°)       | Angle            | (°)      |
| O(3)#1-Gd(1)-O(5)  | 81.3(3)   | O(8)-Gd(2)-O(19) | 139.7(3) |
| O(3)#1-Gd(1)-O(14) | 84.7(3)   | O(8)-Gd(2)-O(17) | 69.7(3)  |

|                    |          |                   |          |
|--------------------|----------|-------------------|----------|
| O(5)-Gd(1)-O(14)   | 152.5(3) | O(19)-Gd(2)-O(17) | 143.0(3) |
| O(3)#1-Gd(1)-O(1)  | 147.1(3) | O(8)-Gd(2)-O(7)   | 66.8(3)  |
| O(5)-Gd(1)-O(1)    | 123.3(3) | O(19)-Gd(2)-O(7)  | 73.2(3)  |
| O(14)-Gd(1)-O(1)   | 79.8(3)  | O(17)-Gd(2)-O(7)  | 131.9(3) |
| O(3)#1-Gd(1)-O(16) | 71.8(4)  | O(8)-Gd(2)-O(11)  | 97.8(3)  |
| O(5)-Gd(1)-O(16)   | 126.6(4) | O(19)-Gd(2)-O(11) | 71.9(3)  |
| O(14)-Gd(1)-O(16)  | 69.8(3)  | O(17)-Gd(2)-O(11) | 136.9(3) |
| O(1)-Gd(1)-O(16)   | 75.6(3)  | O(7)-Gd(2)-O(11)  | 69.4(3)  |
| O(3)#1-Gd(1)-O(13) | 129.8(3) | O(8)-Gd(2)-O(18)  | 144.4(3) |
| O(5)-Gd(1)-O(13)   | 104.7(3) | O(19)-Gd(2)-O(18) | 73.3(4)  |
| O(14)-Gd(1)-O(13)  | 67.2(3)  | O(17)-Gd(2)-O(18) | 88.9(4)  |
| O(1)-Gd(1)-O(13)   | 69.3(3)  | O(7)-Gd(2)-O(18)  | 139.1(3) |
| O(16)-Gd(1)-O(13)  | 128.0(3) | O(11)-Gd(2)-O(18) | 78.4(3)  |
| O(3)#1-Gd(1)-O(15) | 92.8(4)  | O(8)-Gd(2)-O(12)  | 72.2(3)  |
| O(5)-Gd(1)-O(15)   | 70.0(4)  | O(19)-Gd(2)-O(12) | 130.2(3) |
| O(14)-Gd(1)-O(15)  | 134.5(4) | O(17)-Gd(2)-O(12) | 71.5(3)  |
| O(1)-Gd(1)-O(15)   | 78.2(4)  | O(7)-Gd(2)-O(12)  | 112.1(3) |
| O(16)-Gd(1)-O(15)  | 66.4(4)  | O(11)-Gd(2)-O(12) | 65.4(3)  |
| O(13)-Gd(1)-O(15)  | 136.6(3) | O(18)-Gd(2)-O(12) | 74.1(3)  |
| O(3)#1-Gd(1)-O(6)  | 70.5(4)  | O(8)-Gd(2)-O(9)   | 73.5(3)  |
| O(5)-Gd(1)-O(6)    | 66.4(3)  | O(19)-Gd(2)-O(9)  | 89.4(3)  |
| O(14)-Gd(1)-O(6)   | 86.7(3)  | O(17)-Gd(2)-O(9)  | 78.0(3)  |
| O(1)-Gd(1)-O(6)    | 136.5(3) | O(7)-Gd(2)-O(9)   | 71.1(3)  |
| O(16)-Gd(1)-O(6)   | 136.9(4) | O(11)-Gd(2)-O(9)  | 139.7(3) |
| O(13)-Gd(1)-O(6)   | 67.4(3)  | O(18)-Gd(2)-O(9)  | 130.9(3) |
| O(15)-Gd(1)-O(6)   | 135.0(3) | O(12)-Gd(2)-O(9)  | 140.2(3) |
| O(3)#1-Gd(1)-O(2)  | 151.5(3) | O(8)-Gd(2)-O(10)  | 129.4(3) |
| O(5)-Gd(1)-O(2)    | 72.4(3)  | O(19)-Gd(2)-O(10) | 68.2(3)  |
| O(14)-Gd(1)-O(2)   | 123.7(3) | O(17)-Gd(2)-O(10) | 75.0(3)  |
| O(1)-Gd(1)-O(2)    | 52.3(3)  | O(7)-Gd(2)-O(10)  | 120.0(3) |
| O(16)-Gd(1)-O(2)   | 115.8(3) | O(11)-Gd(2)-O(10) | 132.6(3) |
| O(13)-Gd(1)-O(2)   | 69.2(3)  | O(18)-Gd(2)-O(10) | 66.5(3)  |
| O(15)-Gd(1)-O(2)   | 68.4(3)  | O(12)-Gd(2)-O(10) | 127.9(3) |
| O(6)-Gd(1)-O(2)    | 107.3(3) | O(9)-Gd(2)-O(10)  | 64.4(3)  |

Symmetry codes: #1 x+1,y,z+1; #2 x-1,y,z-1; #3 x+1,-y+3/2,z+1/2; #4 -x+2,-y+2,-z+2;  
 #5 x-1,-y+3/2,z-1/2

### Compound 6

| Bond          | Dist(Å)  | Bond        | Dist(Å)  |
|---------------|----------|-------------|----------|
| Tb(1)-O(3)#3  | 2.283(8) | Tb(2)-O(19) | 2.358(7) |
| Tb(1)-O(14)#2 | 2.377(7) | Tb(2)-O(7)  | 2.376(7) |
| Tb(1)-O(6)    | 2.391(8) | Tb(2)-O(17) | 2.389(8) |
| Tb(1)-O(1)    | 2.450(7) | Tb(2)-O(8)  | 2.443(7) |
| Tb(1)-O(16)   | 2.461(9) | Tb(2)-O(18) | 2.446(8) |

|                      |          |                       |          |
|----------------------|----------|-----------------------|----------|
| Tb(1)-O(13)          | 2.475(7) | Tb(2)-O(11)#4         | 2.452(7) |
| Tb(1)-O(15)          | 2.478(9) | Tb(2)-O(10)           | 2.516(7) |
| Tb(1)-O(5)           | 2.495(8) | Tb(2)-O(9)            | 2.520(8) |
| Tb(1)-O(2)           | 2.515(7) | Tb(2)-O(12)#4         | 2.521(8) |
| Angle                | (°)      | Angle                 | (°)      |
| O(3)#3-Tb(1)-O(14)#2 | 85.2(3)  | O(19)-Tb(2)-O(7)      | 140.1(2) |
| O(3)#3-Tb(1)-O(6)    | 81.2(3)  | O(19)-Tb(2)-O(17)     | 142.6(3) |
| O(14)#2-Tb(1)-O(6)   | 152.2(3) | O(7)-Tb(2)-O(17)      | 70.2(3)  |
| O(3)#3-Tb(1)-O(1)    | 146.0(3) | O(19)-Tb(2)-O(8)      | 73.5(3)  |
| O(14)#2-Tb(1)-O(1)   | 79.9(2)  | O(7)-Tb(2)-O(8)       | 66.8(2)  |
| O(6)-Tb(1)-O(1)      | 123.5(2) | O(17)-Tb(2)-O(8)      | 132.4(3) |
| O(3)#3-Tb(1)-O(16)   | 91.3(3)  | O(19)-Tb(2)-O(18)     | 73.9(3)  |
| O(14)#2-Tb(1)-O(16)  | 135.0(3) | O(7)-Tb(2)-O(18)      | 143.2(3) |
| O(6)-Tb(1)-O(16)     | 69.8(3)  | O(17)-Tb(2)-O(18)     | 87.6(3)  |
| O(1)-Tb(1)-O(16)     | 78.4(3)  | O(8)-Tb(2)-O(18)      | 139.8(3) |
| O(3)#3-Tb(1)-O(13)   | 131.3(3) | O(19)-Tb(2)-O(11)#4   | 73.0(3)  |
| O(14)#2-Tb(1)-O(13)  | 66.9(2)  | O(7)-Tb(2)-O(11)#4    | 96.6(2)  |
| O(6)-Tb(1)-O(13)     | 105.1(3) | O(17)-Tb(2)-O(11)#4   | 135.7(3) |
| O(1)-Tb(1)-O(13)     | 69.2(2)  | O(8)-Tb(2)-O(11)#4    | 69.8(2)  |
| O(16)-Tb(1)-O(13)    | 136.8(3) | O(18)-Tb(2)-O(11)#4   | 78.6(3)  |
| O(3)#3-Tb(1)-O(15)   | 70.6(3)  | O(19)-Tb(2)-O(10)     | 68.3(2)  |
| O(14)#2-Tb(1)-O(15)  | 69.9(3)  | O(7)-Tb(2)-O(10)      | 129.6(2) |
| O(6)-Tb(1)-O(15)     | 126.7(3) | O(17)-Tb(2)-O(10)     | 74.6(2)  |
| O(1)-Tb(1)-O(15)     | 75.6(3)  | O(8)-Tb(2)-O(10)      | 120.1(2) |
| O(16)-Tb(1)-O(15)    | 66.7(3)  | O(18)-Tb(2)-O(10)     | 67.0(3)  |
| O(13)-Tb(1)-O(15)    | 127.6(3) | O(11)#4-Tb(2)-O(10)   | 133.6(2) |
| O(3)#3-Tb(1)-O(5)    | 71.7(3)  | O(19)-Tb(2)-O(9)      | 89.8(3)  |
| O(14)#2-Tb(1)-O(5)   | 86.2(3)  | O(7)-Tb(2)-O(9)       | 73.8(2)  |
| O(6)-Tb(1)-O(5)      | 66.5(3)  | O(17)-Tb(2)-O(9)      | 78.3(3)  |
| O(1)-Tb(1)-O(5)      | 136.6(3) | O(8)-Tb(2)-O(9)       | 71.0(2)  |
| O(16)-Tb(1)-O(5)     | 134.9(3) | O(18)-Tb(2)-O(9)      | 131.5(3) |
| O(13)-Tb(1)-O(5)     | 67.5(2)  | O(11)#4-Tb(2)-O(9)    | 140.2(2) |
| O(15)-Tb(1)-O(5)     | 136.5(3) | O(10)-Tb(2)-O(9)      | 64.5(2)  |
| O(3)#3-Tb(1)-O(2)    | 151.0(2) | O(19)-Tb(2)-O(12)#4   | 130.4(3) |
| O(14)#2-Tb(1)-O(2)   | 123.8(2) | O(7)-Tb(2)-O(12)#4    | 71.4(2)  |
| O(6)-Tb(1)-O(2)      | 72.3(2)  | O(17)-Tb(2)-O(12)#4   | 71.2(3)  |
| O(1)-Tb(1)-O(2)      | 52.9(2)  | O(8)-Tb(2)-O(12)#4    | 111.9(2) |
| O(16)-Tb(1)-O(2)     | 69.0(3)  | O(18)-Tb(2)-O(12)#4   | 73.8(3)  |
| O(13)-Tb(1)-O(2)     | 68.7(2)  | O(11)#4-Tb(2)-O(12)#4 | 64.5(2)  |
| O(15)-Tb(1)-O(2)     | 116.7(3) | O(10)-Tb(2)-O(12)#4   | 128.1(2) |
| O(5)-Tb(1)-O(2)      | 106.8(2) | O(9)-Tb(2)-O(12)#4    | 139.6(2) |

Symmetry codes: #1 x+1,-y+3/2,z+1/2; #2 -x,-y+2,-z; #3 x-1,y,z-1; #4 x-1,-y+3/2,z-1/2;

#5 x+1,y,z+1



**Compound 7**

| Bond                | Dist(Å)  | Bond              | Dist(Å)  |
|---------------------|----------|-------------------|----------|
| Dy(1)-O(2)          | 2.254(7) | Dy(2)-O(16)       | 2.366(6) |
| Dy(1)-O(9)          | 2.368(6) | Dy(2)-O(8)        | 2.383(6) |
| Dy(1)-O(6)          | 2.377(6) | Dy(2)-O(12)       | 2.392(7) |
| Dy(1)-O(4)#1        | 2.448(7) | Dy(2)-O(14)       | 2.432(7) |
| Dy(1)-O(10)         | 2.449(6) | Dy(2)-O(7)        | 2.438(6) |
| Dy(1)-O(18)         | 2.456(7) | Dy(2)-O(15)       | 2.441(6) |
| Dy(1)-O(17)         | 2.479(8) | Dy(2)-O(19)       | 2.484(6) |
| Dy(1)-O(3)#1        | 2.482(6) | Dy(2)-O(11)       | 2.492(6) |
| Dy(1)-O(5)          | 2.494(7) | Dy(2)-O(13)       | 2.502(6) |
| Angle               | (°)      | Angle             | (°)      |
| O(2)-Dy(1)-O(9)     | 84.5(2)  | O(16)-Dy(2)-O(8)  | 140.3(2) |
| O(2)-Dy(1)-O(6)     | 81.1(2)  | O(16)-Dy(2)-O(12) | 143.3(2) |
| O(9)-Dy(1)-O(6)     | 152.1(2) | O(8)-Dy(2)-O(12)  | 69.8(2)  |
| O(2)-Dy(1)-O(4)#1   | 145.9(2) | O(16)-Dy(2)-O(14) | 73.7(3)  |
| O(9)-Dy(1)-O(4)#1   | 80.6(2)  | O(8)-Dy(2)-O(14)  | 143.4(2) |
| O(6)-Dy(1)-O(4)#1   | 123.5(2) | O(12)-Dy(2)-O(14) | 87.4(3)  |
| O(2)-Dy(1)-O(10)    | 130.5(2) | O(16)-Dy(2)-O(7)  | 73.6(2)  |
| O(9)-Dy(1)-O(10)    | 67.1(2)  | O(8)-Dy(2)-O(7)   | 66.9(2)  |
| O(6)-Dy(1)-O(10)    | 105.4(2) | O(12)-Dy(2)-O(7)  | 132.6(2) |
| O(4)#1-Dy(1)-O(10)  | 70.0(2)  | O(14)-Dy(2)-O(7)  | 139.9(3) |
| O(2)-Dy(1)-O(18)    | 71.3(3)  | O(16)-Dy(2)-O(15) | 72.0(2)  |
| O(9)-Dy(1)-O(18)    | 70.2(2)  | O(8)-Dy(2)-O(15)  | 97.4(2)  |
| O(6)-Dy(1)-O(18)    | 126.1(2) | O(12)-Dy(2)-O(15) | 135.5(2) |
| O(4)#1-Dy(1)-O(18)  | 74.8(2)  | O(14)-Dy(2)-O(15) | 78.8(2)  |
| O(10)-Dy(1)-O(18)   | 127.8(2) | O(7)-Dy(2)-O(15)  | 69.5(2)  |
| O(2)-Dy(1)-O(17)    | 92.3(3)  | O(16)-Dy(2)-O(19) | 68.6(2)  |
| O(9)-Dy(1)-O(17)    | 134.5(2) | O(8)-Dy(2)-O(19)  | 129.4(2) |
| O(6)-Dy(1)-O(17)    | 70.2(2)  | O(12)-Dy(2)-O(19) | 75.1(2)  |
| O(4)#1-Dy(1)-O(17)  | 77.1(3)  | O(14)-Dy(2)-O(19) | 66.4(2)  |
| O(10)-Dy(1)-O(17)   | 136.6(2) | O(7)-Dy(2)-O(19)  | 120.4(2) |
| O(18)-Dy(1)-O(17)   | 65.9(2)  | O(15)-Dy(2)-O(19) | 133.0(2) |
| O(2)-Dy(1)-O(3)#1   | 150.5(2) | O(16)-Dy(2)-O(11) | 91.0(2)  |
| O(9)-Dy(1)-O(3)#1   | 125.0(2) | O(8)-Dy(2)-O(11)  | 72.8(2)  |
| O(6)-Dy(1)-O(3)#1   | 71.8(2)  | O(12)-Dy(2)-O(11) | 78.2(2)  |
| O(4)#1-Dy(1)-O(3)#1 | 53.3(2)  | O(14)-Dy(2)-O(11) | 131.5(2) |
| O(10)-Dy(1)-O(3)#1  | 69.8(2)  | O(7)-Dy(2)-O(11)  | 71.3(2)  |
| O(18)-Dy(1)-O(3)#1  | 115.9(2) | O(15)-Dy(2)-O(11) | 140.3(2) |
| O(17)-Dy(1)-O(3)#1  | 68.0(2)  | O(19)-Dy(2)-O(11) | 65.2(2)  |
| O(2)-Dy(1)-O(5)     | 71.2(3)  | O(16)-Dy(2)-O(13) | 130.2(2) |
| O(9)-Dy(1)-O(5)     | 86.0(2)  | O(8)-Dy(2)-O(13)  | 71.4(2)  |
| O(6)-Dy(1)-O(5)     | 66.8(2)  | O(12)-Dy(2)-O(13) | 70.3(2)  |
| O(4)#1-Dy(1)-O(5)   | 137.3(2) | O(14)-Dy(2)-O(13) | 74.1(2)  |

|                   |          |                   |          |
|-------------------|----------|-------------------|----------|
| O(10)-Dy(1)-O(5)  | 67.4(2)  | O(7)-Dy(2)-O(13)  | 111.9(2) |
| O(18)-Dy(1)-O(5)  | 137.0(3) | O(15)-Dy(2)-O(13) | 65.3(2)  |
| O(17)-Dy(1)-O(5)  | 135.6(2) | O(19)-Dy(2)-O(13) | 127.8(2) |
| O(3)#1-Dy(1)-O(5) | 107.1(2) | O(11)-Dy(2)-O(13) | 138.5(2) |

Symmetry codes: #1  $x+1,y,z+1$ ; #2  $x-1,y,z-1$ ; #3  $-x+1,-y,-z+2$ ; #4  $x,-y+1/2,z-1/2$ ;  
#5  $x,-y+1/2,z+1/2$

---

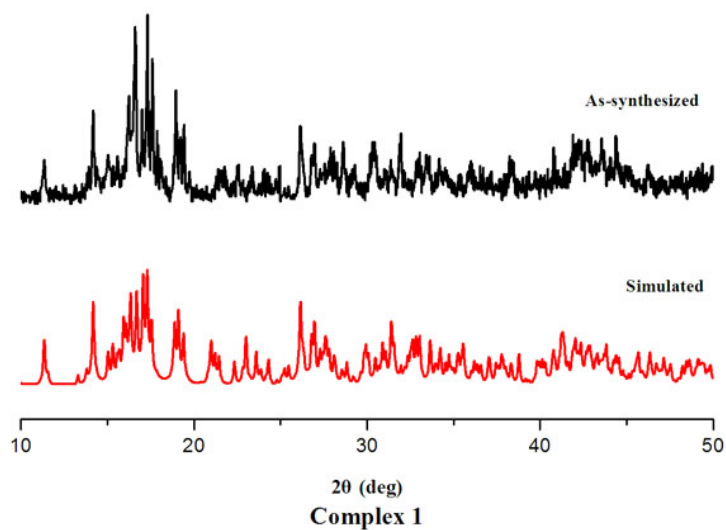

**Figure S1. PXRD patterns of complex 1.**

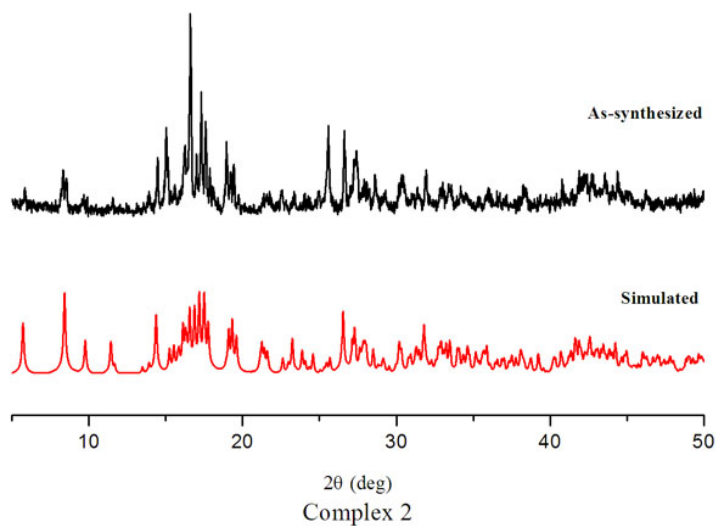

**Figure S2. PXRD patterns of complex 2.**

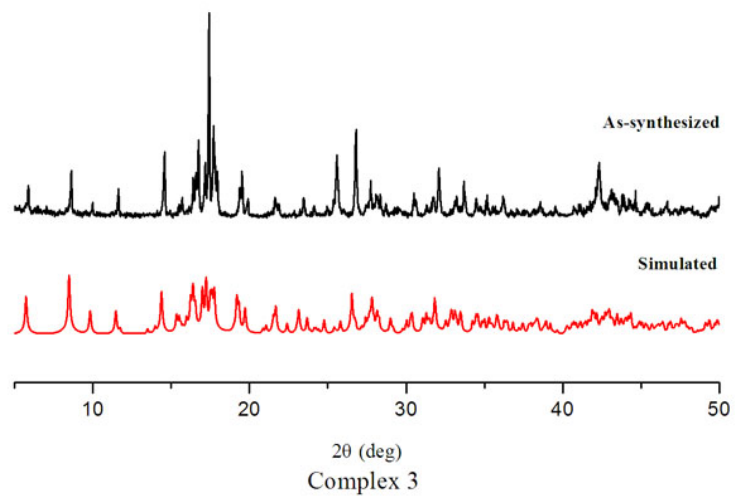

**Figure S3. PXRD patterns of complex 3.**

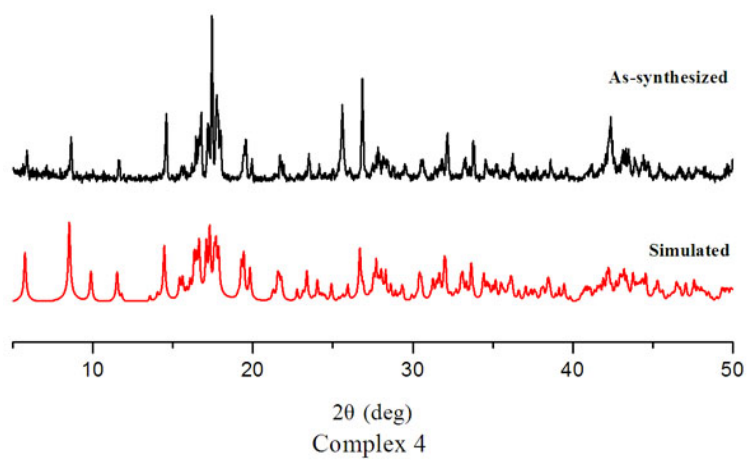

**Figure S4. PXRD patterns of complex 4.**

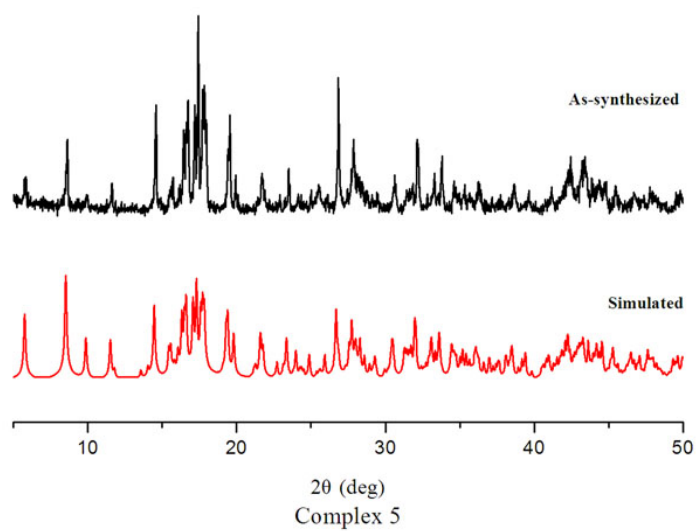

**Figure S5. PXRD patterns of complex 5.**

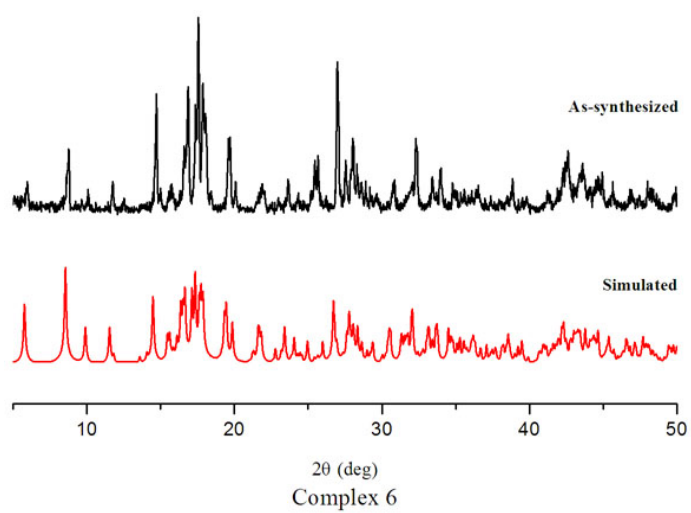

**Figure S6. PXRD patterns of complex 6.**

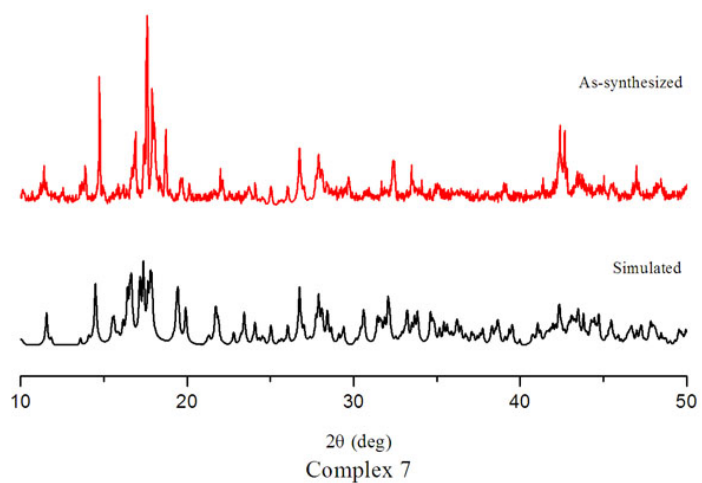

**Figure S7. PXRD patterns of complex 7.**
